# Supplementary material for: A ZrN nanocrystalline coating for polymer electrolyte membrane fuel cell metallic bipolar plates prepared by reactive sputter deposition
Source: Royal Society of Chemistry journal article supplement (doi:10.1039/c5ra09733a), 2015-01-01
Supplement: c5ra09733a1.xlsx [file c5ra09733a1.xlsx]

## Sheet: Survey
Axis	Energy	Elements=	1361
S:\data\ssldata\2014\_UNSW\MatSci\140624\ZrN coating after potentiostatic polarization.DATA\Survey.VGD
Binding Energy (E)
eV		Counts / s
1350.08		17549.1
1349.08		18067.8
1348.08		18390.4
1347.08		18581.8
1346.08		19307.6
1345.08		19313.3
1344.08		20269.1
1343.08		21448.5
1342.08		21898.6
1341.08		21949
1340.08		21593.9
1339.08		21539.2
1338.08		21837.2
1337.08		21435.2
1336.08		20886.5
1335.08		19481
1334.08		19022
1333.08		18740.4
1332.08		18920.1
1331.08		18835.9
1330.08		19518.8
1329.08		19288.6
1328.08		19327.9
1327.08		19542.9
1326.08		19219.2
1325.08		19200.9
1324.08		19547.6
1323.08		19264.9
1322.08		20130.9
1321.08		19636.8
1320.08		19929.5
1319.08		20199.9
1318.08		20913.8
1317.08		20804.1
1316.08		20820.1
1315.08		21352.9
1314.08		20426.7
1313.08		20931.5
1312.08		21703.3
1311.08		21698.5
1310.08		21207.5
1309.08		21066.5
1308.08		21046.6
1307.08		21003.2
1306.08		21121.5
1305.08		20907.1
1304.08		20965
1303.08		21286.7
1302.08		21548.4
1301.08		21583.8
1300.08		21991.7
1299.08		21934.4
1298.08		21892.1
1297.08		22066.5
1296.08		22728
1295.08		23107.3
1294.08		22908.7
1293.08		23592.1
1292.08		23619.4
1291.08		23573.2
1290.08		23709.3
1289.08		22996.9
1288.08		23213.6
1287.08		22544.7
1286.08		22682.1
1285.08		23201.7
1284.08		23868.5
1283.08		24135.4
1282.08		24455.5
1281.08		24361.8
1280.08		25079.6
1279.08		24223.7
1278.08		24146.9
1277.08		25526.5
1276.08		25540.5
1275.08		24975.8
1274.08		25547.9
1273.08		25732.9
1272.08		26412.1
1271.08		26801.7
1270.08		26247.5
1269.08		27072.1
1268.08		26923.4
1267.08		26900.1
1266.08		27673.4
1265.08		27652.3
1264.08		26965.1
1263.08		27764.5
1262.08		27781.4
1261.08		27622.3
1260.08		27188.2
1259.08		27531.1
1258.08		27913.6
1257.08		28415.6
1256.08		28215.3
1255.08		28762.9
1254.08		28247
1253.08		28075.6
1252.08		29414.6
1251.08		29630.9
1250.08		29367.6
1249.08		29758.8
1248.08		29672.2
1247.08		29759.3
1246.08		30239.8
1245.08		30634.3
1244.08		30579.2
1243.08		31045.7
1242.08		31115.1
1241.08		31845.6
1240.08		31186.9
1239.08		31243.2
1238.08		31092.6
1237.08		32201.6
1236.08		32613.8
1235.08		31387.1
1234.08		31695.1
1233.08		31871.3
1232.08		32516
1231.08		32986.3
1230.08		33018.4
1229.08		32522
1228.08		32522
1227.08		33232.1
1226.08		33737.8
1225.08		34528.6
1224.08		34273.1
1223.08		34574.1
1222.08		34612.5
1221.08		35066.5
1220.08		34709.9
1219.08		35146.1
1218.08		35894.3
1217.08		36029
1216.08		35713.2
1215.08		35992
1214.08		35991.4
1213.08		35563.4
1212.08		36137.4
1211.08		36039.2
1210.08		35797.9
1209.08		35756.1
1208.08		36390.8
1207.08		36443.5
1206.08		36182
1205.08		36159.1
1204.08		36534.1
1203.08		36714
1202.08		36635.7
1201.08		35763
1200.08		36836.4
1199.08		36625.5
1198.08		36575
1197.08		36846.4
1196.08		37014.8
1195.08		37260.2
1194.08		37404.4
1193.08		37559.4
1192.08		38280.5
1191.08		38467
1190.08		38160.7
1189.08		38171.2
1188.08		38206.8
1187.08		38556.2
1186.08		38858
1185.08		39172.9
1184.08		39001.2
1183.08		39538.2
1182.08		39242.6
1181.08		39181.6
1180.08		39329.3
1179.08		40033.7
1178.08		40361
1177.08		39956.5
1176.08		40607.8
1175.08		40929.1
1174.08		40293.9
1173.08		41593.2
1172.08		40749.2
1171.08		41562.6
1170.08		42014.5
1169.08		41350.3
1168.08		41184.5
1167.08		42127.7
1166.08		41653.9
1165.08		41432.1
1164.08		42771.8
1163.08		43343.1
1162.08		43445.6
1161.08		43723.7
1160.08		42914.7
1159.08		43289.8
1158.08		43819.1
1157.08		42974.7
1156.08		42752.7
1155.08		44147.1
1154.08		43757.2
1153.08		44438.7
1152.08		44999.5
1151.08		44923.9
1150.08		44899.7
1149.08		45169.4
1148.08		45213.2
1147.08		45992.8
1146.08		45314.5
1145.08		44953.4
1144.08		45016.9
1143.08		46298.3
1142.08		46754.1
1141.08		46413.5
1140.08		46274.7
1139.08		46355.8
1138.08		47459.5
1137.08		47262.9
1136.08		47056.6
1135.08		47105.7
1134.08		47735.8
1133.08		48109.4
1132.08		48089.3
1131.08		47932.6
1130.08		48017.4
1129.08		48838
1128.08		48206.2
1127.08		49745.5
1126.08		49452.9
1125.08		49612.1
1124.08		48828
1123.08		48909.4
1122.08		49994.3
1121.08		49607
1120.08		49886.2
1119.08		52088.1
1118.08		52052.4
1117.08		51823.9
1116.08		51634.1
1115.08		50827.7
1114.08		51701.8
1113.08		51153.8
1112.08		50702.9
1111.08		51287.6
1110.08		50618
1109.08		50825.5
1108.08		51667.7
1107.08		52315.1
1106.08		54307.7
1105.08		55381.4
1104.08		59410.4
1103.08		60908.9
1102.08		59100
1101.08		56486.9
1100.08		54173.1
1099.08		52466.1
1098.08		51427
1097.08		50656.7
1096.08		49880.9
1095.08		50502.3
1094.08		48901.2
1093.08		48890.7
1092.08		49060.6
1091.08		48257
1090.08		48362.8
1089.08		48772.8
1088.08		48723.3
1087.08		49221.6
1086.08		48461.4
1085.08		50059
1084.08		48615.9
1083.08		48839.6
1082.08		49057.7
1081.08		49076.6
1080.08		50013
1079.08		50879.2
1078.08		50443.5
1077.08		50699.8
1076.08		50839
1075.08		51400.6
1074.08		50598.1
1073.08		50677.7
1072.08		51288.3
1071.08		52370.6
1070.08		52024.2
1069.08		52157.9
1068.08		52493.1
1067.08		53055.3
1066.08		52244
1065.08		52177.8
1064.08		52555.3
1063.08		51897
1062.08		52511.3
1061.08		53068.1
1060.08		53123.4
1059.08		52011.7
1058.08		52854.7
1057.08		52592.6
1056.08		53127.4
1055.08		53912.4
1054.08		54246.6
1053.08		54278.1
1052.08		54600.2
1051.08		53470.6
1050.08		53771
1049.08		54982.7
1048.08		55162.4
1047.08		53992
1046.08		53944.8
1045.08		54328.3
1044.08		55658
1043.08		55539.2
1042.08		55369.9
1041.08		55022
1040.08		54700.8
1039.08		55727.8
1038.08		56285
1037.08		56202.2
1036.08		56703.8
1035.08		56864.5
1034.08		55930.6
1033.08		57214.3
1032.08		55850
1031.08		57177.6
1030.08		56900.9
1029.08		57327.9
1028.08		57684.1
1027.08		58575.9
1026.08		58970.9
1025.08		58570.4
1024.08		58043.7
1023.08		58114.8
1022.08		58643.7
1021.08		58183.7
1020.08		59461.2
1019.08		59110.4
1018.08		59399.6
1017.08		60415.5
1016.08		60918
1015.08		60476.5
1014.08		60665.7
1013.08		61258.5
1012.08		60369.2
1011.08		61028.4
1010.08		61082
1009.08		61732.1
1008.08		62774
1007.08		62445.8
1006.08		62508.5
1005.08		62026.4
1004.08		62691.1
1003.08		62278.3
1002.08		62620.2
1001.08		63126.5
1000.08		62610.4
999.08		63177
998.08		62897.1
997.08		63190.6
996.08		63598.7
995.08		63322.1
994.08		62877.4
993.08		62976.3
992.08		63557.6
991.08		63181.2
990.08		64303.3
989.08		63659.4
988.08		63821.9
987.08		63752.7
986.08		64076.6
985.08		64171.3
984.08		63053.5
983.08		64347.3
982.08		63860
981.08		63580.2
980.08		62956.2
979.08		63767
978.08		64426.9
977.08		63297.6
976.08		64622.2
975.08		63962.3
974.08		64730.5
973.08		64858.9
972.08		64011.1
971.08		64673.1
970.08		63705.2
969.08		64138.5
968.08		63696.9
967.08		63699.4
966.08		64099.6
965.08		63880.7
964.08		63671.7
963.08		63185.4
962.08		64141.2
961.08		64838.9
960.08		64559
959.08		64264.5
958.08		63463.7
957.08		64110.5
956.08		64711.2
955.08		64085.9
954.08		64689.4
953.08		64925.1
952.08		65586.9
951.08		65605.4
950.08		64687.5
949.08		64812.9
948.08		65015.4
947.08		65332.9
946.08		66161.8
945.08		66536.6
944.08		66148.7
943.08		67105.3
942.08		66673.8
941.08		66652.3
940.08		65827.2
939.08		66127.7
938.08		66361.8
937.08		66781.2
936.08		66443.6
935.08		66874.9
934.08		67188.3
933.08		66771.8
932.08		67634.9
931.08		67260.4
930.08		66918.6
929.08		68185.6
928.08		68295.1
927.08		67859.3
926.08		67899.3
925.08		68156.9
924.08		69733.7
923.08		69069.7
922.08		69098.4
921.08		69080.1
920.08		68679.4
919.08		69631.2
918.08		70094.4
917.08		70422.5
916.08		71178.5
915.08		70916.1
914.08		70673
913.08		70403.9
912.08		70752.4
911.08		69515.7
910.08		69915.3
909.08		71090.6
908.08		71518.6
907.08		70275.4
906.08		70996.4
905.08		71088.3
904.08		72809.7
903.08		72246.9
902.08		71739.7
901.08		72106.2
900.08		71824.6
899.08		71926.8
898.08		72403.9
897.08		73209.1
896.08		73065.3
895.08		73000.6
894.08		73794.3
893.08		74349.2
892.08		73205.3
891.08		73215.5
890.08		74714.7
889.08		74520.2
888.08		74188.2
887.08		74255.8
886.08		74276.9
885.08		72886.3
884.08		73941.1
883.08		74121
882.08		73555.8
881.08		73408.3
880.08		74663.6
879.08		73929.7
878.08		74090.2
877.08		74373.5
876.08		74513.9
875.08		73650.7
874.08		73905.9
873.08		74665.2
872.08		74894.9
871.08		75771.3
870.08		76217.5
869.08		75411.3
868.08		75414.5
867.08		74652.7
866.08		74892.9
865.08		74847.6
864.08		75112.4
863.08		76318.4
862.08		75200.6
861.08		75715.4
860.08		76547.4
859.08		76045.8
858.08		76759.5
857.08		76725.3
856.08		78589.9
855.08		77008.9
854.08		78160.5
853.08		78374.3
852.08		77490.3
851.08		77071.3
850.08		78011.5
849.08		77958.1
848.08		79193.9
847.08		78966
846.08		78199.9
845.08		79073.8
844.08		79339.6
843.08		80399.2
842.08		80028
841.08		79726.6
840.08		79119.3
839.08		80604.2
838.08		80693.9
837.08		79736.6
836.08		79675
835.08		79473.1
834.08		79445.8
833.08		79643.4
832.08		78595.8
831.08		78821
830.08		80164.2
829.08		79956.2
828.08		80291.9
827.08		79905.5
826.08		80539.5
825.08		80063.9
824.08		80005.8
823.08		80184.5
822.08		79030.7
821.08		78552
820.08		80662.7
819.08		80050.5
818.08		79110.4
817.08		79792.7
816.08		81617.3
815.08		81628
814.08		80507.4
813.08		81635.5
812.08		82485.9
811.08		82868.5
810.08		81648.7
809.08		81400.9
808.08		82288.2
807.08		82387.7
806.08		82336.2
805.08		82392.3
804.08		82883
803.08		82784.9
802.08		82995
801.08		82591.8
800.08		83030.1
799.08		84007.5
798.08		83111.2
797.08		82929.3
796.08		82126.9
795.08		82797.1
794.08		83984.4
793.08		84562.7
792.08		84370.8
791.08		84016.2
790.08		83898.1
789.08		83548.4
788.08		84675.5
787.08		85588.9
786.08		86017.5
785.08		85990.2
784.08		85831.3
783.08		86704.5
782.08		86912.5
781.08		86859.4
780.08		86225
779.08		85913.3
778.08		86054.7
777.08		85113.1
776.08		85733.9
775.08		85897.2
774.08		85919.6
773.08		86594.6
772.08		87145.1
771.08		87163.5
770.08		87964.8
769.08		87737.9
768.08		88166.2
767.08		87881.5
766.08		87324.2
765.08		86784.1
764.08		88930.5
763.08		88442
762.08		87362.3
761.08		87822.9
760.08		89174.7
759.08		89248.8
758.08		88852
757.08		88009.4
756.08		89810.1
755.08		88742.7
754.08		89818.6
753.08		89729.3
752.08		90351.7
751.08		90054.5
750.08		90082.3
749.08		89493.7
748.08		89817.9
747.08		90463.5
746.08		90252.4
745.08		90334.1
744.08		90263.4
743.08		91147.2
742.08		91383.1
741.08		90593.5
740.08		90453.9
739.08		91039.9
738.08		90983.6
737.08		91453
736.08		91265.8
735.08		91160.5
734.08		90903.8
733.08		92088.6
732.08		93631.9
731.08		92972.1
730.08		94169.2
729.08		93358.5
728.08		92422.5
727.08		93492
726.08		94264.9
725.08		94338.8
724.08		95285.7
723.08		95785.3
722.08		95557.1
721.08		95058.6
720.08		94637.9
719.08		95436.8
718.08		94679.9
717.08		94184.9
716.08		95545.5
715.08		95671.8
714.08		95198.5
713.08		95062.6
712.08		96422.8
711.08		96149.2
710.08		96267.8
709.08		96814
708.08		96061
707.08		95819
706.08		95286.8
705.08		94761.2
704.08		93796.3
703.08		93163
702.08		94972
701.08		94693.7
700.08		94524.3
699.08		94466.1
698.08		94219.9
697.08		94625
696.08		96437.6
695.08		95575.1
694.08		96078.5
693.08		96019.5
692.08		94691.7
691.08		94973.1
690.08		96603.3
689.08		97235.3
688.08		96724.9
687.08		96117.3
686.08		96240.8
685.08		96657.7
684.08		97347.2
683.08		97932.9
682.08		97161.4
681.08		97937.7
680.08		97862.3
679.08		97766.8
678.08		98551.8
677.08		98784.6
676.08		97775.9
675.08		96793.6
674.08		98086.4
673.08		98956.2
672.08		99586.2
671.08		98818.9
670.08		99813.3
669.08		99364.8
668.08		101004
667.08		100926
666.08		100871
665.08		101055
664.08		101152
663.08		101116
662.08		102264
661.08		102257
660.08		101515
659.08		101119
658.08		102319
657.08		102275
656.08		101583
655.08		100956
654.08		102496
653.08		102923
652.08		102641
651.08		101773
650.08		102630
649.08		104900
648.08		104932
647.08		104414
646.08		105362
645.08		104644
644.08		104403
643.08		103956
642.08		103080
641.08		104975
640.08		105588
639.08		104744
638.08		105776
637.08		106387
636.08		106288
635.08		105072
634.08		105856
633.08		107451
632.08		107259
631.08		106274
630.08		106120
629.08		106488
628.08		107446
627.08		107179
626.08		107149
625.08		108070
624.08		109067
623.08		109390
622.08		108175
621.08		108234
620.08		110248
619.08		109885
618.08		108694
617.08		110180
616.08		110845
615.08		110187
614.08		109861
613.08		110393
612.08		111056
611.08		110770
610.08		110500
609.08		110132
608.08		112073
607.08		112880
606.08		112871
605.08		113899
604.08		112138
603.08		111319
602.08		112822
601.08		112425
600.08		113218
599.08		114475
598.08		114103
597.08		114696
596.08		113764
595.08		114273
594.08		115974
593.08		114037
592.08		115042
591.08		115588
590.08		115917
589.08		116640
588.08		116142
587.08		117558
586.08		118353
585.08		118991
584.08		119283
583.08		119761
582.08		119152
581.08		119020
580.08		119509
579.08		119253
578.08		120628
577.08		119633
576.08		119801
575.08		120148
574.08		120170
573.08		119531
572.08		120329
571.08		120577
570.08		120804
569.08		120296
568.08		120987
567.08		120854
566.08		121054
565.08		121279
564.08		121950
563.08		120940
562.08		121804
561.08		121217
560.08		122477
559.08		122717
558.08		121967
557.08		121623
556.08		122550
555.08		121084
554.08		122200
553.08		123361
552.08		122587
551.08		122043
550.08		123853
549.08		123918
548.08		122788
547.08		123921
546.08		123928
545.08		124015
544.08		124564
543.08		123963
542.08		123951
541.08		123009
540.08		124553
539.08		124753
538.08		123662
537.08		124580
536.08		125085
535.08		124385
534.08		125039
533.08		124353
532.08		124216
531.08		124761
530.08		125503
529.08		124640
528.08		124937
527.08		124422
526.08		125006
525.08		124576
524.08		124807
523.08		126365
522.08		125988
521.08		124746
520.08		126589
519.08		125898
518.08		126381
517.08		125787
516.08		126027
515.08		126946
514.08		126498
513.08		127117
512.08		126930
511.08		127820
510.08		127375
509.08		127974
508.08		128213
507.08		128257
506.08		128883
505.08		128198
504.08		129059
503.08		129501
502.08		129024
501.08		130726
500.08		131901
499.08		130381
498.08		132304
497.08		131449
496.08		131083
495.08		130848
494.08		131031
493.08		131465
492.08		131680
491.08		132824
490.08		133542
489.08		132512
488.08		133833
487.08		133592
486.08		134008
485.08		133563
484.08		134849
483.08		134662
482.08		135332
481.08		135023
480.08		136361
479.08		137881
478.08		137995
477.08		137153
476.08		136773
475.08		137706
474.08		137759
473.08		138641
472.08		138992
471.08		138823
470.08		138835
469.08		139016
468.08		136618
467.08		138580
466.08		140356
465.08		141948
464.08		142598
463.08		142256
462.08		142686
461.08		143179
460.08		144304
459.08		143506
458.08		144952
457.08		146219
456.08		147054
455.08		149485
454.08		146568
453.08		142296
452.08		140617
451.08		139617
450.08		141529
449.08		140835
448.08		141042
447.08		140873
446.08		142181
445.08		141938
444.08		143634
443.08		143702
442.08		144096
441.08		144559
440.08		145553
439.08		146014
438.08		147391
437.08		150469
436.08		151114
435.08		155748
434.08		159050
433.08		163739
432.08		167252
431.08		169438
430.08		168988
429.08		163654
428.08		156491
427.08		148653
426.08		143672
425.08		140046
424.08		139535
423.08		137668
422.08		135740
421.08		135596
420.08		133317
419.08		133781
418.08		136110
417.08		133308
416.08		133466
415.08		135881
414.08		134225
413.08		133349
412.08		133842
411.08		134642
410.08		132835
409.08		133050
408.08		132962
407.08		131696
406.08		130385
405.08		130089
404.08		129721
403.08		130879
402.08		132781
401.08		133908
400.08		137158
399.08		147235
398.08		171686
397.08		193154
396.08		173578
395.08		140718
394.08		131858
393.08		130466
392.08		130933
391.08		131226
390.08		132086
389.08		131712
388.08		132553
387.08		131887
386.08		130960
385.08		130860
384.08		132663
383.08		133580
382.08		132695
381.08		133669
380.08		133855
379.08		132776
378.08		132148
377.08		133981
376.08		135502
375.08		134107
374.08		135883
373.08		134719
372.08		133810
371.08		134946
370.08		135442
369.08		134274
368.08		135192
367.08		135154
366.08		134703
365.08		135016
364.08		134326
363.08		133715
362.08		135647
361.08		136460
360.08		136850
359.08		137214
358.08		138827
357.08		139560
356.08		139317
355.08		139220
354.08		140745
353.08		140359
352.08		143207
351.08		145590
350.08		150660
349.08		159273
348.08		170005
347.08		184525
346.08		200271
345.08		220630
344.08		227773
343.08		208231
342.08		168438
341.08		141755
340.08		126970
339.08		120582
338.08		122704
337.08		126399
336.08		135765
335.08		152493
334.08		176642
333.08		203356
332.08		234412
331.08		265883
330.08		262644
329.08		206754
328.08		142279
327.08		106112
326.08		91300.3
325.08		84461.4
324.08		82886.5
323.08		79964.5
322.08		80267.1
321.08		79510.4
320.08		77676.8
319.08		75715.9
318.08		74610.2
317.08		75035
316.08		73383.2
315.08		72711.6
314.08		72336.4
313.08		72797.6
312.08		73080.7
311.08		72942.5
310.08		72203.5
309.08		70659.2
308.08		71852.1
307.08		71562.9
306.08		72576.7
305.08		73132
304.08		73774
303.08		73798.5
302.08		73137.2
301.08		73416.9
300.08		73533.6
299.08		72896.3
298.08		73105.3
297.08		73721.2
296.08		73469
295.08		73710.5
294.08		74064.6
293.08		73111.6
292.08		73534.4
291.08		74094.7
290.08		73722.5
289.08		74449.9
288.08		74644
287.08		74882.1
286.08		76505.8
285.08		78488.8
284.08		78977.6
283.08		81837.1
282.08		85415.2
281.08		80507.2
280.08		75882.6
279.08		73860.1
278.08		75278.9
277.08		75215.3
276.08		75664.9
275.08		74882.2
274.08		75036.4
273.08		75433.1
272.08		76525.9
271.08		76423
270.08		76608
269.08		76689.3
268.08		77261.4
267.08		77753.2
266.08		76857.4
265.08		77091.1
264.08		77193.7
263.08		77200.3
262.08		77449.3
261.08		77444
260.08		77213.2
259.08		76773.7
258.08		77775.9
257.08		77511.3
256.08		77198.4
255.08		77114.3
254.08		77987.6
253.08		79098.3
252.08		79905.2
251.08		78310.2
250.08		78076.2
249.08		79755.1
248.08		80286.4
247.08		82989.5
246.08		83642.3
245.08		85638.5
244.08		89566.7
243.08		89943.2
242.08		87512.6
241.08		84111.3
240.08		83239.4
239.08		81778.9
238.08		81045.9
237.08		80897.4
236.08		82600.8
235.08		80949.5
234.08		80276.3
233.08		82132
232.08		83760.4
231.08		84061.8
230.08		84240.5
229.08		86016.3
228.08		86634.8
227.08		88105.8
226.08		88931.8
225.08		90047.9
224.08		91569.6
223.08		93639.2
222.08		92600.3
221.08		90560.5
220.08		87637.1
219.08		84566.1
218.08		81923.5
217.08		81835.1
216.08		78956.4
215.08		78376.4
214.08		80221.3
213.08		80227.9
212.08		79647.5
211.08		78697.9
210.08		78036.6
209.08		77704.9
208.08		79326.1
207.08		81417.2
206.08		83431.9
205.08		86697.9
204.08		89646.5
203.08		92093.8
202.08		92566.6
201.08		94924.6
200.08		95043.9
199.08		94969
198.08		96106.1
197.08		99153.2
196.08		100186
195.08		98501.8
194.08		96293.9
193.08		92460.5
192.08		87767.9
191.08		81884.9
190.08		77406.3
189.08		75852.9
188.08		77423.8
187.08		88813.8
186.08		110609
185.08		139851
184.08		181871
183.08		252613
182.08		312862
181.08		306056
180.08		295092
179.08		241441
178.08		112519
177.08		32629.5
176.08		19873.7
175.08		17917.6
174.08		16437.4
173.08		15380.2
172.08		15679.6
171.08		15306.4
170.08		14971.9
169.08		15389.3
168.08		15579.1
167.08		15536.9
166.08		15157.7
165.08		15642.2
164.08		15761.9
163.08		15726.1
162.08		15704.1
161.08		15314.3
160.08		15375.9
159.08		15063.5
158.08		15911
157.08		15558
156.08		15498.4
155.08		15799.8
154.08		15634.1
153.08		15843
152.08		15728
151.08		15630.2
150.08		15545.3
149.08		15861.2
148.08		15998.8
147.08		16676.8
146.08		16452.5
145.08		15935.1
144.08		16422.4
143.08		16123.4
142.08		16303.2
141.08		16484.7
140.08		15634.1
139.08		16294
138.08		16253.1
137.08		16173.6
136.08		16826.9
135.08		16826
134.08		16540.5
133.08		16984.3
132.08		16584.7
131.08		16274.9
130.08		16846.9
129.08		16752.1
128.08		16550.6
127.08		17038.9
126.08		17209.2
125.08		16986.9
124.08		17098.3
123.08		16959.2
122.08		16937.2
121.08		16952.4
120.08		17145.9
119.08		17408.8
118.08		17222.2
117.08		17532.6
116.08		17497.5
115.08		17642.8
114.08		17843.9
113.08		18073.3
112.08		17853.4
111.08		17451.3
110.08		17514.6
109.08		17765.5
108.08		18155.1
107.08		17652.3
106.08		17527.6
105.08		18096.9
104.08		17926.6
103.08		17777.8
102.08		18576.3
101.08		18577.2
100.08		18748.7
99.08		18892.1
98.08		19137.6
97.08		19043.9
96.08		19074.8
95.08		19693
94.08		19683.1
93.08		19470.7
92.08		19186.1
91.08		19451.7
90.08		19429.9
89.08		19198.8
88.08		19424.1
87.08		19377.6
86.08		18733.8
85.08		18372.6
84.08		18601.6
83.08		19109.2
82.08		19194.7
81.08		19040.7
80.08		18991.5
79.08		19314.3
78.08		20284.3
77.08		20281.6
76.08		20320.1
75.08		20375.3
74.08		21122.9
73.08		21909
72.08		22014.9
71.08		21850.6
70.08		21229.2
69.08		21631.1
68.08		21099.8
67.08		20872.1
66.08		21133.6
65.08		20861.4
64.08		20194.5
63.08		19805.1
62.08		19548.1
61.08		19250.4
60.08		19002.1
59.08		20033.4
58.08		19945.4
57.08		20145.6
56.08		21452.6
55.08		23386
54.08		26848
53.08		29953.2
52.08		31249.1
51.08		30308
50.08		27711.4
49.08		23488.3
48.08		20815.5
47.08		19144.9
46.08		18088.4
45.08		18806.1
44.08		18958.8
43.08		18233
42.08		17457.8
41.08		17022.9
40.08		16786.5
39.08		16182.8
38.08		16795.8
37.08		17550.5
36.08		18425
35.08		20585
34.08		23882.9
33.08		27842.8
32.08		34372.1
31.08		43439
30.08		51671.4
29.08		55732
28.08		50500
27.08		32639.2
26.08		16551.7
25.08		10162.4
24.08		9011.22
23.08		8519.51
22.08		7426.31
21.08		6963.56
20.08		6383.04
19.08		6838.62
18.08		8310.42
17.08		11121.2
16.08		11691.1
15.08		9418.59
14.08		6006.09
13.08		3368.87
12.08		2868.72
11.08		3394.13
10.08		3564.4
9.08		3686.64
8.08		4455.66
7.08		6179.87
6.08		8314.82
5.08		9009.21
4.08		7550.93
3.08		5257.31
2.08		3813.16
1.08		3960.68
0.08		3246.22
-0.92		1268.36
-1.92		125.767
-2.92		29.8447
-3.92		57.1295
-4.92		28.9646
-5.92		49.8007
-6.92		29.3085
-7.92		35.169
-8.92		41.8626
-9.92		44.013

## Sheet: Zr3d
Axis	Elements=	161
S:\data\ssldata\2014\_UNSW\MatSci\140624\ZrN coating after potentiostatic polarization.DATA\Zr3d.VGD
Binding Energy (E)			Backgnd.
eV	Counts / s		Counts / s
190.49	3093.84		0
190.39	3154.03		0
190.29	3201.8		0
190.19	3105.54		0
190.09	3142.96		0
189.99	3031.83		0
189.89	3045.91		0
189.79	2978		3115.92
189.69	3250.6		3115.33
189.59	3271.21		3114.72
189.49	3090.9		3114.17
189.39	3176.26		3113.65
189.29	3165.95		3113.15
189.19	3160.97		3112.59
189.09	3033.62		3111.97
188.99	3029.93		3111.38
188.89	3062.79		3110.82
188.79	3273.84		3110.17
188.69	3166.5		3109.48
188.59	3124.47		3108.75
188.49	3169.59		3107.94
188.39	3329.13		3107.03
188.29	3293.91		3106.03
188.19	3284.94		3104.89
188.09	3354.92		3103.69
187.99	3353.01		3102.37
187.89	3270.46		3100.93
187.79	3204.71		3099.35
187.69	3220.13		3097.67
187.59	3292.03		3095.87
187.49	3310.34		3093.89
187.39	3270.73		3091.73
187.29	3291.86		3089.36
187.19	3263.78		3086.7
187.09	3231.29		3083.8
186.99	3235.28		3080.6
186.89	3208.25		3077.06
186.79	3259.49		3073.13
186.69	3208.18		3068.74
186.59	3205.38		3063.89
186.49	3137.04		3058.57
186.39	3168.9		3052.76
186.29	3152.83		3046.37
186.19	3197.07		3039.37
186.09	3197.6		3031.79
185.99	3087.84		3023.62
185.89	3097.93		3014.84
185.79	3070.51		3005.47
185.69	3133.85		2995.5
185.59	3075.32		2984.99
185.49	3123.02		2973.92
185.39	3108.75		2962.3
185.29	3025.28		2950.2
185.19	3051.66		2937.72
185.09	3029.68		2924.97
184.99	3013.28		2911.91
184.89	3067.96		2898.46
184.79	3054.51		2884.51
184.69	3020.89		2870.19
184.59	3066.56		2855.46
184.49	3099.6		2840.22
184.39	3145.42		2824.41
184.29	3214.13		2807.98
184.19	3558.68		2790.9
184.09	3720.61		2772.99
183.99	4046.59		2753.99
183.89	4640.17		2733.84
183.79	5526.52		2712.44
183.69	6455.73		2689.86
183.59	7689.46		2665.81
183.49	8711.9		2640.1
183.39	9686.4		2612.55
183.29	10640.8		2583.05
183.19	11700.8		2551.22
183.09	12732.7		2516.81
182.99	13839.7		2479.72
182.89	14693		2439.96
182.79	15519.3		2397.43
182.69	16389.8		2352.26
182.59	17112.9		2304.67
182.49	17790.8		2255.22
182.39	18517.6		2204.54
182.29	18646.8		2153.3
182.19	18184.9		2102.06
182.09	17089.1		2051.75
181.99	15906.9		2003.07
181.89	14787.3		1956.64
181.79	13586.1		1912.85
181.69	12083.5		1872.11
181.59	10729.3		1834.55
181.49	9584.92		1800.04
181.39	8983.97		1768.17
181.29	8500.09		1738.43
181.19	8222.86		1710.25
181.09	8187.05		1683.01
180.99	8478.49		1655.93
180.89	8855.13		1628.28
180.79	9574.87		1599.12
180.69	10348.6		1567.63
180.59	11313.7		1533.03
180.49	12251.9		1494.89
180.39	14046.8		1452.9
180.29	16034.5		1407.17
180.19	17948		1357.96
180.09	19044.8		1306.01
179.99	19899.8		1252.17
179.89	19831.3		1197.45
179.79	19386		1142.87
179.69	17679.5		1089.74
179.59	15761.1		1039.46
179.49	13583.5		993.289
179.39	11273.2		951.979
179.29	8933.86		916.076
179.19	6528.05		885.799
179.09	4527.78		861.162
178.99	3294.32		841.684
178.89	2475.18		826.797
178.79	1770.78		815.848
178.69	1339.22		808.164
178.59	1201.29		803.02
178.49	1120.88		799.663
178.39	1044.64		797.474
178.29	889.673		796.072
178.19	868.109		795.182
178.09	851.386		794.587
177.99	817.901		794.12
177.89	798.077		793.759
177.79	848.229		793.494
177.69	835.116		793.316
177.59	832.763		793.164
177.49	777.476		0
177.39	735.171		0
177.29	725.316		0
177.19	714.13		0
177.09	767.812		0
176.99	753.326		0
176.89	784.287		0
176.79	670.928		0
176.69	652.792		0
176.59	796.838		0
176.49	773.3		0
176.39	766.838		0
176.29	760.108		0
176.19	735.476		0
176.09	650.866		0
175.99	688.488		0
175.89	788.011		0
175.79	751.297		0
175.69	797.52		0
175.59	778.193		0
175.49	724.184		0
175.39	730.508		0
175.29	727.863		0
175.19	696.746		0
175.09	695.371		0
174.99	720.681		0
174.89	765.178		0
174.79	757.502		0
174.69	710.548		0
174.59	781.314		0
174.49	742.133		0

## Sheet: N1s
Axis	Energy	Elements=	161
S:\data\ssldata\2014\_UNSW\MatSci\Song Xu_140624\No2_ZrC-ZrO2_etched 300s.DATA\N1s.VGD
Binding Energy (E)				Backgnd.
eV		Counts / s		Counts / s
405.08		5926.91		0
404.98		5858.34		0
404.88		5893.92		0
404.78		5782.2		0
404.68		5807.4		0
404.58		5807.53		0
404.48		5818.47		0
404.38		5803.06		0
404.28		5711.81		0
404.18		5773.5		0
404.08		5794.13		0
403.98		5789.66		0
403.88		5796.53		0
403.78		5792.93		0
403.68		5725.01		0
403.58		5804.87		0
403.48		5798.59		0
403.38		5675.47		0
403.28		5788.56		0
403.18		5788.75		0
403.08		5813.04		0
402.98		5880.11		0
402.88		5832.97		0
402.78		5890.22		0
402.68		6050.73		0
402.58		5916.2		0
402.48		5918.49		0
402.38		5860.37		0
402.28		5932.87		0
402.18		5819.18		0
402.08		5974.24		0
401.98		5984.11		0
401.88		5861.99		0
401.78		5838.87		0
401.68		5810.3		0
401.58		5989.15		0
401.48		6018.37		0
401.38		5877.43		0
401.28		5952.41		0
401.18		5995.08		0
401.08		5848.22		0
400.98		5916.47		5960.98
400.88		6069.14		5960.91
400.78		6004.48		5960.81
400.68		5941.02		5960.68
400.58		5961.23		5960.55
400.48		6035.76		5960.41
400.38		6098.7		5960.29
400.28		6119.7		5960.13
400.18		6042.97		5959.99
400.08		6018.88		5959.84
399.98		5987.13		5959.67
399.88		6051.52		5959.49
399.78		6014.28		5959.3
399.68		6070.88		5959.09
399.58		6040.34		5958.87
399.48		5995.4		5958.59
399.38		6127.38		5958.28
399.28		6157.03		5957.91
399.18		6258.14		5957.52
399.08		6306.8		5957.08
398.98		6256.35		5956.58
398.88		6259.72		5956.02
398.78		6221.07		5955.38
398.68		6298.67		5954.68
398.58		6380.14		5953.9
398.48		6425.3		5953.01
398.38		6408.23		5951.99
398.28		6516.96		5950.76
398.18		6575.8		5949.26
398.08		6920.84		5947.35
397.98		7056.12		5944.9
397.88		7399.93		5941.83
397.78		7869.96		5938
397.68		8631.63		5933.32
397.58		9327.35		5927.83
397.48		10023.4		5921.6
397.38		10786.4		5914.75
397.28		11318.9		5907.4
397.18		11185.5		5899.68
397.08		10831.5		5891.77
396.98		10464		5883.85
396.88		9914.09		5876.12
396.78		9416.79		5868.78
396.68		8958.74		5862.03
396.58		8572.68		5856
396.48		8137.64		5850.72
396.38		7680.75		5846.18
396.28		7335.38		5842.34
396.18		7022.74		5839.16
396.08		6745.8		5836.57
395.98		6489.32		5834.5
395.88		6299.9		5832.9
395.78		6097.58		5831.69
395.68		5957.87		5830.78
395.58		5851.78		5830.12
395.48		5866.36		5829.66
395.38		5841.19		5829.35
395.28		5887.4		5829.13
395.18		5895.84		5828.97
395.08		5867.65		5828.86
394.98		5890.17		5828.76
394.88		5943.96		5828.65
394.78		5878.76		5828.53
394.68		5714.93		0
394.58		5735.98		0
394.48		5768.29		0
394.38		5830.69		0
394.28		5804.38		0
394.18		5761.83		0
394.08		5813.46		0
393.98		5881.3		0
393.88		5803.25		0
393.78		5890.58		0
393.68		5890.83		0
393.58		5882.88		0
393.48		5811.38		0
393.38		5809.14		0
393.28		5782.32		0
393.18		5903.28		0
393.08		5815.39		0
392.98		5793.64		0
392.88		5738.58		0
392.78		5874.08		0
392.68		5798.91		0
392.58		5835.4		0
392.48		5874.57		0
392.38		5818.51		0
392.28		5822.37		0
392.18		5918.19		0
392.08		5832.55		0
391.98		5830.07		0
391.88		5794.12		0
391.78		5805.88		0
391.68		5907.37		0
391.58		5901.71		0
391.48		5907.33		0
391.38		6030.25		0
391.28		5834.15		0
391.18		5813.42		0
391.08		5910.63		0
390.98		5939.39		0
390.88		5865.73		0
390.78		5881.54		0
390.68		5856.94		0
390.58		5769.34		0
390.48		5817.91		0
390.38		5797.68		0
390.28		5861.22		0
390.18		5847.59		0
390.08		5885.2		0
389.98		5852.98		0
389.88		5921.26		0
389.78		5818.03		0
389.68		5957.21		0
389.58		5866.37		0
389.48		5934.94		0
389.38		5894.05		0
389.28		5844.63		0
389.18		5938.88		0
389.08		5932.72		0

## Sheet: C1s
Axis	Energy	Elements=	161
S:\data\ssldata\2014\_UNSW\MatSci\Song Xu_140624\No2_ZrC-ZrO2_etched 300s.DATA\C1s.VGD
Binding Energy (E)				Backgnd.
eV		Counts / s		Counts / s
292.08		3304.65		0
291.98		3309.59		0
291.88		3342.29		0
291.78		3297.68		0
291.68		3305.69		0
291.58		3440.87		0
291.48		3221.28		0
291.38		3287.55		0
291.28		3320.28		0
291.18		3271.36		0
291.08		3299.89		0
290.98		3277.5		0
290.88		3334.82		0
290.78		3303.1		0
290.68		3309.82		0
290.58		3343.7		0
290.48		3311.12		0
290.38		3301.1		0
290.28		3265.4		0
290.18		3368.88		0
290.08		3352.76		0
289.98		3389.25		0
289.88		3374.38		0
289.78		3338.07		0
289.68		3350.9		0
289.58		3360.08		0
289.48		3266.36		0
289.38		3296.17		0
289.28		3350.5		0
289.18		3297.89		0
289.08		3345.45		0
288.98		3350.23		0
288.88		3301.62		0
288.78		3411.85		0
288.68		3380.72		0
288.58		3302.13		0
288.48		3336.01		0
288.38		3322.98		0
288.28		3348.72		0
288.18		3370.92		0
288.08		3295.09		0
287.98		3338.62		0
287.88		3290.11		0
287.78		3303.38		0
287.68		3367.52		0
287.58		3315.36		0
287.48		3358.16		0
287.38		3335.89		3343.37
287.28		3334.61		3343.33
287.18		3343.17		3343.3
287.08		3348.9		3343.27
286.98		3428.66		3343.22
286.88		3424.41		3343.17
286.78		3305.15		3343.12
286.68		3379.57		3343.06
286.58		3409.66		3342.97
286.48		3424.26		3342.88
286.38		3383.9		3342.78
286.28		3395.86		3342.69
286.18		3499.22		3342.6
286.08		3378.42		3342.49
285.98		3392.96		3342.37
285.88		3399.85		3342.24
285.78		3390.04		3342.1
285.68		3436.41		3341.92
285.58		3456.52		3341.73
285.48		3477.97		3341.53
285.38		3528.81		3341.31
285.28		3582.57		3341.08
285.18		3516.42		3340.82
285.08		3567.47		3340.54
284.98		3479.3		3340.23
284.88		3507.66		3339.92
284.78		3554.4		3339.6
284.68		3569.02		3339.28
284.58		3555.62		3338.99
284.48		3549.18		3338.7
284.38		3521.21		3338.42
284.28		3461.19		3338.14
284.18		3465.48		3337.88
284.08		3427.45		3337.64
283.98		3570.69		3337.44
283.88		3448.77		3337.23
283.78		3350.24		3337.04
283.68		3388.87		3336.84
283.58		3387.37		3336.63
283.48		3496.88		3336.42
283.38		3506.34		3336.2
283.28		3556.25		3335.98
283.18		3569.76		3335.75
283.08		3423.12		3335.46
282.98		3469.2		3335.11
282.88		3590.59		3334.68
282.78		3546.63		3334.16
282.68		3703.64		3333.5
282.58		3830.62		3332.71
282.48		3904.98		3331.77
282.38		4155.29		3330.69
282.28		4379.09		3329.5
282.18		4542.78		3328.23
282.08		4520.79		3326.94
281.98		4380.12		3325.65
281.88		4229.59		3324.39
281.78		4113.51		3323.18
281.68		3723.37		3322.06
281.58		3654.05		3321.06
281.48		3608.66		3320.22
281.38		3544.24		3319.57
281.28		3515.07		3319.07
281.18		3531.6		3318.7
281.08		3449.93		3318.46
280.98		3264.06		3318.28
280.88		3304.96		3318.15
280.78		3289.72		3318.05
280.68		3294.08		3317.97
280.58		3247.55		3317.92
280.48		3373.61		3317.9
280.38		3401.23		3317.9
280.28		3347.93		3317.9
280.18		3327.2		3317.9
280.08		3353.23		3317.9
279.98		3263.19		3317.9
279.88		3278.9		3317.89
279.78		3214.16		3317.89
279.68		3382.1		3317.89
279.58		3298.09		3317.89
279.48		3347.59		3317.89
279.38		3368.36		0
279.28		3279.63		0
279.18		3335.28		0
279.08		3345		0
278.98		3457.11		0
278.88		3344.16		0
278.78		3335.08		0
278.68		3266.94		0
278.58		3299.75		0
278.48		3408.65		0
278.38		3363.48		0
278.28		3345.92		0
278.18		3263.76		0
278.08		3405.03		0
277.98		3321.99		0
277.88		3391.56		0
277.78		3378.44		0
277.68		3289.55		0
277.58		3292.76		0
277.48		3373.33		0
277.38		3356.23		0
277.28		3398.3		0
277.18		3393.72		0
277.08		3461.44		0
276.98		3454.67		0
276.88		3430.58		0
276.78		3392.56		0
276.68		3362.57		0
276.58		3317.79		0
276.48		3309.18		0
276.38		3312.87		0
276.28		3365.31		0
276.18		3357.8		0
276.08		3388.83		0

## Sheet: Peak Table
Peak Table :
	Name	Start BE	Peak BE	End BE	FWHM eV	Area (P) CPS.eV	At. %	SF Al Scof
	N1s	401.01	397.18	394.78	1.13	6958.33	26.83	1.8
	Zr3d	189.38	179.53	177.18	1.28	65012.2	62.87	7.04
	C1s A	287.38	282.11	279.48	0.86	1058.16	7.26	1
	C1s B	287.38	284.72	279.48	1.92	441.52	3.04	1

## Sheet: Titles
14:37:08 Tuesday, June 24, 2014
ZrN coating after potentiostatic polarization.vgp - Processing View
Data Files :	Title	File Name	Comment
	Zr3d	S:\...\MatSci\140624\ZrN coating after potentiostatic polarization.DATA\Zr3d.VGD
	Survey	S:\...\MatSci\140624\ZrN coating after potentiostatic polarization.DATA\Survey.VGD
	N1s	S:\...\MatSci\140624\ZrN coating after potentiostatic polarization.DATA\N1s.VGD
	C1s	S:\...\MatSci\140624\ZrN coating after potentiostatic polarization.DATA\C1s.VGD

## Sheet: Experimental
Surface Analysis Laboratory
Solid State Elemental Analysis Unit
Mark Wainwright Analytical Centre
Room G61, Chemical Sciences Building F10
The University of New South Walse
Sydney, NSW 2052, Australia
Analytical Technique:	X-Ray Photoelectron Spectroscopy (XPS)
Instrument:	ESCALAB250Xi
Manufacturer:	Thermo Scientific, UK
Background vacuum:	better than 2E-9 mbar
X-ray source:	mono-chromated Al K alpha (energy 1486.68 eV)
Power:	150W (13 kV x 12 mA)
Spot size:	500 micrometres
Photoelectron takeoff angle:	90 degrees
Pass energy:	100 eV for survey scans, or 20 eV for region scans
Software:	Avantage
Spectrometre calibration:	Au 4f7 = 83.96 eV, Ag 3d5 = 368.21 eV, Cu2p3 = 932.62 eV
Binding energy reference:	C 1s = 285.0 eV for adventitious hydrocarbon
