# Supplementary material for: A ZrN nanocrystalline coating for polymer electrolyte membrane fuel cell metallic bipolar plates prepared by reactive sputter deposition
Source: Royal Society of Chemistry journal article supplement (doi:10.1039/c5ra09733a), 2015-01-01
Supplement: c5ra09733a2.xlsx [file c5ra09733a2.xlsx]

## Sheet: Survey
Axis	Energy	Elements=	1361
S:\data\ssldata\2014\_UNSW\MatSci\140702\ZrN coating before potentiostatic polarization.DATA\Survey etched 300s.VGD
Binding Energy (E)
eV		Counts / s
1350.08		63663.9
1349.08		63987.1
1348.08		64378.9
1347.08		66507.1
1346.08		67658.3
1345.08		69060.3
1344.08		71524.3
1343.08		73619.8
1342.08		74398.8
1341.08		73368
1340.08		72299.1
1339.08		71252.1
1338.08		70433.7
1337.08		69502.1
1336.08		68563.6
1335.08		66865.4
1334.08		66191.7
1333.08		64515.4
1332.08		63131.7
1331.08		62432.2
1330.08		62811.3
1329.08		63489.6
1328.08		63156.3
1327.08		62705.7
1326.08		62959.2
1325.08		63340.6
1324.08		63778
1323.08		64698.9
1322.08		64309.5
1321.08		64653.3
1320.08		65291.4
1319.08		64075.7
1318.08		64522.8
1317.08		66048.3
1316.08		64737.6
1315.08		65779.2
1314.08		66865.2
1313.08		67008.3
1312.08		67901.6
1311.08		67099.7
1310.08		66095
1309.08		66349.4
1308.08		66787.6
1307.08		65520.9
1306.08		65911.5
1305.08		65886.3
1304.08		65913.5
1303.08		65734.1
1302.08		65740.7
1301.08		65008.1
1300.08		66520.3
1299.08		66785.8
1298.08		67506.1
1297.08		67075.2
1296.08		67858.7
1295.08		67493.6
1294.08		67600.1
1293.08		67665.1
1292.08		68048.3
1291.08		68927.2
1290.08		68832.7
1289.08		67634.4
1288.08		69302.1
1287.08		70005.2
1286.08		70457.1
1285.08		69293.9
1284.08		69893
1283.08		69555.4
1282.08		69965.6
1281.08		70298.3
1280.08		71307.4
1279.08		70777.6
1278.08		71026.8
1277.08		71365.2
1276.08		72290.8
1275.08		73575
1274.08		73297.3
1273.08		72817.2
1272.08		73771.4
1271.08		75265.3
1270.08		75112
1269.08		75352
1268.08		73278.1
1267.08		73828.2
1266.08		72913.1
1265.08		74345.7
1264.08		74577
1263.08		75062.7
1262.08		75348.9
1261.08		75502.2
1260.08		76765.3
1259.08		75816
1258.08		75790.4
1257.08		76937.6
1256.08		76892.5
1255.08		78016.1
1254.08		77528.4
1253.08		77151.6
1252.08		76695
1251.08		78176.4
1250.08		78785.1
1249.08		79589.5
1248.08		79204.5
1247.08		78445.2
1246.08		80382
1245.08		81236.2
1244.08		79838.7
1243.08		80460.3
1242.08		80746.4
1241.08		81620.8
1240.08		81794.6
1239.08		82531.1
1238.08		80539.2
1237.08		82973.1
1236.08		82992.5
1235.08		82520
1234.08		83369.2
1233.08		83608.9
1232.08		83238.9
1231.08		84249.3
1230.08		85473.5
1229.08		85597.5
1228.08		85063
1227.08		85055.8
1226.08		85115.8
1225.08		86835
1224.08		87613
1223.08		86840.3
1222.08		86995.2
1221.08		86732.7
1220.08		86824
1219.08		87804.1
1218.08		88617.9
1217.08		89737.6
1216.08		88680.1
1215.08		88832.2
1214.08		90615.2
1213.08		89281.5
1212.08		88227.5
1211.08		87705.5
1210.08		90061.1
1209.08		90725.1
1208.08		88912.8
1207.08		88036.7
1206.08		88654.5
1205.08		90785.8
1204.08		89675.1
1203.08		89664
1202.08		90192.1
1201.08		89934.6
1200.08		90987.1
1199.08		90271.1
1198.08		91466.3
1197.08		91641.3
1196.08		91946.7
1195.08		92153.3
1194.08		92170.1
1193.08		91994.8
1192.08		92942.5
1191.08		92593
1190.08		93853.5
1189.08		94948.2
1188.08		93981
1187.08		94778.7
1186.08		94350.2
1185.08		95343.7
1184.08		95300
1183.08		94985.9
1182.08		95419.3
1181.08		95316.5
1180.08		96093.4
1179.08		96353
1178.08		98308.7
1177.08		96911
1176.08		96389.2
1175.08		98594.3
1174.08		97539
1173.08		98443.7
1172.08		98172.8
1171.08		97919.9
1170.08		98472.8
1169.08		99689.7
1168.08		98438
1167.08		99894.8
1166.08		99654.1
1165.08		100401
1164.08		100203
1163.08		100401
1162.08		100895
1161.08		101161
1160.08		100388
1159.08		101843
1158.08		101479
1157.08		102211
1156.08		103289
1155.08		103339
1154.08		101918
1153.08		102575
1152.08		103665
1151.08		103794
1150.08		104574
1149.08		103150
1148.08		103376
1147.08		104475
1146.08		106039
1145.08		106700
1144.08		107133
1143.08		106164
1142.08		104936
1141.08		106301
1140.08		106603
1139.08		107325
1138.08		106946
1137.08		107780
1136.08		107379
1135.08		107110
1134.08		107693
1133.08		107446
1132.08		109611
1131.08		111094
1130.08		110123
1129.08		110681
1128.08		112119
1127.08		111802
1126.08		112368
1125.08		113079
1124.08		112592
1123.08		111288
1122.08		112003
1121.08		112674
1120.08		113420
1119.08		114583
1118.08		116353
1117.08		117279
1116.08		117619
1115.08		115273
1114.08		114620
1113.08		114283
1112.08		115942
1111.08		116112
1110.08		115472
1109.08		114336
1108.08		116260
1107.08		118923
1106.08		121189
1105.08		125121
1104.08		128733
1103.08		131554
1102.08		129728
1101.08		123868
1100.08		121114
1099.08		117463
1098.08		115722
1097.08		112442
1096.08		110973
1095.08		111107
1094.08		110110
1093.08		110308
1092.08		110088
1091.08		110127
1090.08		109630
1089.08		109651
1088.08		108875
1087.08		108995
1086.08		109065
1085.08		110877
1084.08		110473
1083.08		111565
1082.08		110653
1081.08		110254
1080.08		110244
1079.08		110853
1078.08		109956
1077.08		111759
1076.08		112372
1075.08		112842
1074.08		112947
1073.08		113899
1072.08		114678
1071.08		115061
1070.08		116025
1069.08		116177
1068.08		116947
1067.08		117613
1066.08		117523
1065.08		115697
1064.08		115309
1063.08		115330
1062.08		114349
1061.08		114875
1060.08		114582
1059.08		115801
1058.08		115822
1057.08		115396
1056.08		115811
1055.08		115303
1054.08		116668
1053.08		116415
1052.08		116715
1051.08		117841
1050.08		117770
1049.08		117919
1048.08		118239
1047.08		119518
1046.08		118618
1045.08		119522
1044.08		120914
1043.08		120280
1042.08		120572
1041.08		120649
1040.08		120073
1039.08		120486
1038.08		121158
1037.08		121839
1036.08		122686
1035.08		122970
1034.08		123103
1033.08		122060
1032.08		123427
1031.08		124443
1030.08		123592
1029.08		123088
1028.08		122505
1027.08		123388
1026.08		123757
1025.08		122395
1024.08		123393
1023.08		123437
1022.08		124991
1021.08		124325
1020.08		125164
1019.08		128029
1018.08		126562
1017.08		124573
1016.08		125586
1015.08		125353
1014.08		124112
1013.08		126307
1012.08		125245
1011.08		124500
1010.08		124813
1009.08		124810
1008.08		125536
1007.08		125922
1006.08		125271
1005.08		124934
1004.08		125723
1003.08		124346
1002.08		126820
1001.08		125655
1000.08		124097
999.08		125081
998.08		126172
997.08		125781
996.08		126199
995.08		124052
994.08		125308
993.08		126323
992.08		127567
991.08		126795
990.08		127637
989.08		126722
988.08		127143
987.08		127216
986.08		127087
985.08		128919
984.08		126143
983.08		125071
982.08		127448
981.08		127367
980.08		127795
979.08		127637
978.08		125722
977.08		129143
976.08		128216
975.08		127087
974.08		128919
973.08		127143
972.08		126071
971.08		127448
970.08		126970
969.08		127233
968.08		126142
967.08		127668
966.08		127351
965.08		126051
964.08		125386
963.08		127698
962.08		127350
961.08		128135
960.08		126437
959.08		127303
958.08		126358
957.08		126371
956.08		127523
955.08		125377
954.08		126342
953.08		126880
952.08		127292
951.08		126354
950.08		129597
949.08		127895
948.08		126910
947.08		127950
946.08		127301
945.08		128806
944.08		128671
943.08		128666
942.08		128876
941.08		129165
940.08		128223
939.08		129696
938.08		129529
937.08		129258
936.08		128089
935.08		130517
934.08		130697
933.08		131042
932.08		130427
931.08		129619
930.08		130180
929.08		130609
928.08		131804
927.08		130741
926.08		131088
925.08		132870
924.08		133193
923.08		135234
922.08		133077
921.08		132983
920.08		132227
919.08		132133
918.08		133123
917.08		133889
916.08		134303
915.08		132838
914.08		134466
913.08		135688
912.08		135281
911.08		135229
910.08		135038
909.08		136362
908.08		137606
907.08		136981
906.08		136388
905.08		136015
904.08		139063
903.08		140063
902.08		140564
901.08		138587
900.08		138726
899.08		138327
898.08		137773
897.08		138286
896.08		139541
895.08		139638
894.08		138973
893.08		139885
892.08		140116
891.08		139472
890.08		140038
889.08		140027
888.08		140915
887.08		140358
886.08		139763
885.08		138698
884.08		138529
883.08		138331
882.08		137399
881.08		138245
880.08		139419
879.08		139735
878.08		138251
877.08		140383
876.08		141226
875.08		140504
874.08		139385
873.08		140876
872.08		140549
871.08		141009
870.08		141258
869.08		140614
868.08		140753
867.08		140318
866.08		139026
865.08		140491
864.08		141954
863.08		141602
862.08		142373
861.08		143959
860.08		143920
859.08		143058
858.08		143013
857.08		143255
856.08		143704
855.08		143977
854.08		144112
853.08		144304
852.08		144890
851.08		145925
850.08		146917
849.08		147734
848.08		146561
847.08		146871
846.08		146745
845.08		149447
844.08		149389
843.08		149855
842.08		147459
841.08		149085
840.08		149455
839.08		150226
838.08		149385
837.08		146754
836.08		145889
835.08		146851
834.08		146395
833.08		146540
832.08		145023
831.08		143745
830.08		144464
829.08		144660
828.08		145350
827.08		145507
826.08		145176
825.08		145092
824.08		145839
823.08		146120
822.08		144912
821.08		146733
820.08		146452
819.08		145690
818.08		145796
817.08		146390
816.08		146125
815.08		146042
814.08		146280
813.08		146925
812.08		146804
811.08		146333
810.08		146652
809.08		148012
808.08		148089
807.08		147958
806.08		148506
805.08		148170
804.08		148583
803.08		149078
802.08		151687
801.08		150614
800.08		150400
799.08		151848
798.08		150863
797.08		150892
796.08		152200
795.08		152160
794.08		151528
793.08		151676
792.08		151585
791.08		152181
790.08		153121
789.08		152969
788.08		155557
787.08		155237
786.08		155589
785.08		155945
784.08		157672
783.08		156799
782.08		158311
781.08		155815
780.08		155157
779.08		153734
778.08		152556
777.08		153013
776.08		155693
775.08		154664
774.08		154973
773.08		155325
772.08		155789
771.08		156814
770.08		156963
769.08		157518
768.08		156963
767.08		156598
766.08		155639
765.08		156910
764.08		156162
763.08		155841
762.08		156259
761.08		157674
760.08		157471
759.08		158314
758.08		159054
757.08		158108
756.08		159279
755.08		157121
754.08		159037
753.08		158500
752.08		158230
751.08		157374
750.08		158594
749.08		158997
748.08		159141
747.08		159531
746.08		158006
745.08		159449
744.08		160403
743.08		160450
742.08		160718
741.08		161969
740.08		161847
739.08		160665
738.08		161896
737.08		160658
736.08		161317
735.08		162481
734.08		162568
733.08		162431
732.08		163031
731.08		162750
730.08		163576
729.08		163832
728.08		161227
727.08		162768
726.08		163839
725.08		162250
724.08		162423
723.08		160763
722.08		160427
721.08		160131
720.08		161885
719.08		160282
718.08		161590
717.08		160981
716.08		161317
715.08		161518
714.08		162306
713.08		162649
712.08		161281
711.08		161547
710.08		162730
709.08		161143
708.08		162956
707.08		162024
706.08		163796
705.08		162916
704.08		162671
703.08		163054
702.08		162523
701.08		163021
700.08		163243
699.08		163773
698.08		163240
697.08		163224
696.08		163739
695.08		163715
694.08		163927
693.08		162531
692.08		163597
691.08		163853
690.08		164794
689.08		165433
688.08		165122
687.08		164901
686.08		166084
685.08		165015
684.08		166281
683.08		168515
682.08		167369
681.08		165347
680.08		165567
679.08		165561
678.08		165205
677.08		166825
676.08		167887
675.08		169454
674.08		168850
673.08		168836
672.08		169706
671.08		169614
670.08		169691
669.08		169488
668.08		170243
667.08		171180
666.08		171723
665.08		172342
664.08		170678
663.08		171643
662.08		171390
661.08		172144
660.08		173248
659.08		173756
658.08		172685
657.08		172977
656.08		174704
655.08		173068
654.08		172451
653.08		175225
652.08		175171
651.08		174267
650.08		175474
649.08		176874
648.08		177332
647.08		174552
646.08		175089
645.08		176109
644.08		175111
643.08		174451
642.08		175965
641.08		177201
640.08		176720
639.08		178130
638.08		179355
637.08		178572
636.08		178690
635.08		180581
634.08		181769
633.08		180369
632.08		181310
631.08		181343
630.08		179019
629.08		180396
628.08		181983
627.08		182637
626.08		182262
625.08		182472
624.08		181399
623.08		182873
622.08		184799
621.08		184958
620.08		183960
619.08		184092
618.08		184895
617.08		184763
616.08		185985
615.08		186175
614.08		186689
613.08		186450
612.08		185318
611.08		186844
610.08		189496
609.08		185753
608.08		186371
607.08		186505
606.08		186112
605.08		188480
604.08		187523
603.08		188208
602.08		187760
601.08		189022
600.08		188634
599.08		189067
598.08		190264
597.08		189490
596.08		190613
595.08		191163
594.08		190292
593.08		191677
592.08		191081
591.08		192687
590.08		190391
589.08		192082
588.08		191547
587.08		190865
586.08		191772
585.08		192891
584.08		193748
583.08		191815
582.08		191311
581.08		192454
580.08		192447
579.08		193071
578.08		192029
577.08		193095
576.08		195216
575.08		194661
574.08		194757
573.08		195897
572.08		196857
571.08		195783
570.08		196115
569.08		196095
568.08		195947
567.08		196075
566.08		196845
565.08		195104
564.08		196755
563.08		195941
562.08		196006
561.08		196709
560.08		196642
559.08		196573
558.08		196917
557.08		196963
556.08		196146
555.08		196832
554.08		196261
553.08		196835
552.08		196480
551.08		195481
550.08		196016
549.08		196706
548.08		196351
547.08		198140
546.08		197617
545.08		196949
544.08		197647
543.08		196359
542.08		197845
541.08		196296
540.08		198305
539.08		198076
538.08		198785
537.08		197571
536.08		198284
535.08		199676
534.08		197247
533.08		197119
532.08		197289
531.08		198908
530.08		197127
529.08		198467
528.08		198258
527.08		197769
526.08		198163
525.08		199732
524.08		198895
523.08		199566
522.08		198764
521.08		198321
520.08		199298
519.08		198337
518.08		199684
517.08		199428
516.08		198096
515.08		197957
514.08		196745
513.08		198145
512.08		197556
511.08		197842
510.08		199261
509.08		198024
508.08		200723
507.08		199613
506.08		199109
505.08		200293
504.08		199105
503.08		199628
502.08		199771
501.08		200327
500.08		199735
499.08		199521
498.08		200380
497.08		207645
496.08		200896
495.08		200411
494.08		205740
493.08		200661
492.08		200967
491.08		202334
490.08		201264
489.08		203494
488.08		204619
487.08		205280
486.08		204888
485.08		206092
484.08		206864
483.08		207326
482.08		208516
481.08		200063
480.08		209799
479.08		207451
478.08		208954
477.08		208123
476.08		211957
475.08		212326
474.08		213782
473.08		215137
472.08		212423
471.08		214501
470.08		214757
469.08		213639
468.08		213682
467.08		213452
466.08		214856
465.08		214471
464.08		215914
463.08		217662
462.08		219932
461.08		223083
460.08		222542
459.08		220494
458.08		221104
457.08		224758
456.08		227700
455.08		230135
454.08		227735
453.08		218640
452.08		214974
451.08		215707
450.08		215283
449.08		215218
448.08		217876
447.08		217857
446.08		218475
445.08		219340
444.08		217967
443.08		218734
442.08		220473
441.08		221280
440.08		221558
439.08		224502
438.08		226308
437.08		231368
436.08		236770
435.08		244049
434.08		250231
433.08		255476
432.08		261069
431.08		261401
430.08		255778
429.08		248127
428.08		235409
427.08		223976
426.08		217794
425.08		211709
424.08		207712
423.08		205420
422.08		203490
421.08		203656
420.08		203847
419.08		203486
418.08		203095
417.08		202596
416.08		201801
415.08		201607
414.08		202032
413.08		203064
412.08		203312
411.08		204307
410.08		201823
409.08		200754
408.08		199818
407.08		200470
406.08		198614
405.08		199031
404.08		200358
403.08		199630
402.08		202154
401.08		204118
400.08		211287
399.08		224064
398.08		261513
397.08		281993
396.08		251403
395.08		211456
394.08		200709
393.08		199523
392.08		199302
391.08		201188
390.08		203810
389.08		204861
388.08		203338
387.08		203167
386.08		202721
385.08		202900
384.08		202278
383.08		201715
382.08		204004
381.08		205241
380.08		204489
379.08		204556
378.08		205016
377.08		205654
376.08		205352
375.08		204408
374.08		204411
373.08		204302
372.08		206579
371.08		207829
370.08		207315
369.08		205119
368.08		204063
367.08		202819
366.08		204435
365.08		204674
364.08		206048
363.08		208673
362.08		210594
361.08		213360
360.08		212795
359.08		213019
358.08		214023
357.08		213883
356.08		211720
355.08		210907
354.08		213235
353.08		216502
352.08		221724
351.08		230672
350.08		246675
349.08		267992
348.08		289701
347.08		309441
346.08		320799
345.08		332166
344.08		334315
343.08		299723
342.08		245448
341.08		208882
340.08		194786
339.08		189843
338.08		194873
337.08		207767
336.08		233927
335.08		276915
334.08		317510
333.08		344501
332.08		364257
331.08		391130
330.08		367812
329.08		285693
328.08		202901
327.08		155158
326.08		136543
325.08		126872
324.08		123271
323.08		120459
322.08		119883
321.08		119083
320.08		116773
319.08		115286
318.08		113363
317.08		110293
316.08		110949
315.08		110133
314.08		110320
313.08		110995
312.08		110601
311.08		109748
310.08		109677
309.08		108390
308.08		109960
307.08		110051
306.08		110504
305.08		111369
304.08		112019
303.08		110896
302.08		108824
301.08		109638
300.08		110493
299.08		109827
298.08		110234
297.08		110527
296.08		110479
295.08		111832
294.08		112615
293.08		111846
292.08		112805
291.08		113170
290.08		113798
289.08		112959
288.08		113043
287.08		113154
286.08		115261
285.08		115669
284.08		114939
283.08		119849
282.08		122571
281.08		119248
280.08		114243
279.08		114690
278.08		114633
277.08		115963
276.08		116301
275.08		114015
274.08		114730
273.08		117797
272.08		117052
271.08		115962
270.08		116565
269.08		116916
268.08		117713
267.08		118089
266.08		118289
265.08		118578
264.08		117000
263.08		119856
262.08		119099
261.08		119498
260.08		119440
259.08		118905
258.08		118775
257.08		118767
256.08		119451
255.08		118989
254.08		119584
253.08		119204
252.08		120176
251.08		121346
250.08		121258
249.08		122337
248.08		123882
247.08		125084
246.08		128753
245.08		133171
244.08		139034
243.08		139279
242.08		133822
241.08		126226
240.08		124648
239.08		124410
238.08		125829
237.08		124039
236.08		123952
235.08		123870
234.08		124619
233.08		125864
232.08		126695
231.08		127936
230.08		130140
229.08		132216
228.08		134342
227.08		136133
226.08		138137
225.08		139465
224.08		140786
223.08		139215
222.08		137011
221.08		132763
220.08		130597
219.08		127982
218.08		123902
217.08		121944
216.08		122241
215.08		120363
214.08		121511
213.08		120735
212.08		122774
211.08		124370
210.08		123369
209.08		122484
208.08		123674
207.08		125412
206.08		128303
205.08		131580
204.08		134207
203.08		137776
202.08		139919
201.08		144365
200.08		148932
199.08		153810
198.08		155313
197.08		158106
196.08		156830
195.08		152579
194.08		146933
193.08		138377
192.08		128603
191.08		122640
190.08		117008
189.08		117952
188.08		132450
187.08		172088
186.08		230435
185.08		284060
184.08		352780
183.08		440174
182.08		469842
181.08		423394
180.08		395684
179.08		312238
178.08		140434
177.08		44147.2
176.08		29646.7
175.08		27503.1
174.08		25444.2
173.08		25187.6
172.08		25062.9
171.08		24272.6
170.08		23963.6
169.08		23266.7
168.08		24347.8
167.08		24785
166.08		24288.8
165.08		24639.2
164.08		24684.8
163.08		25102.6
162.08		24599.8
161.08		24810.7
160.08		24970.1
159.08		24384.3
158.08		24135
157.08		24128.6
156.08		24606.5
155.08		24058.4
154.08		24523.5
153.08		24761.9
152.08		24791.8
151.08		24788.7
150.08		24898.2
149.08		24860.8
148.08		25723.8
147.08		25123.1
146.08		25408.7
145.08		26353.8
144.08		25860.5
143.08		25401
142.08		25462.7
141.08		25505.9
140.08		26038.8
139.08		26003.9
138.08		26102.7
137.08		25459.1
136.08		25536.1
135.08		26006.6
134.08		26405.1
133.08		26288
132.08		26368.1
131.08		26443.8
130.08		25988.1
129.08		26483.6
128.08		25936.8
127.08		26898.5
126.08		26987.6
125.08		26967.3
124.08		27012.1
123.08		27540.4
122.08		27705.1
121.08		27102.1
120.08		27581.3
119.08		27831.5
118.08		27540.3
117.08		27578.8
116.08		28340.7
115.08		28356.9
114.08		27924.7
113.08		27482.2
112.08		27820.4
111.08		28211.3
110.08		27578.3
109.08		28266.1
108.08		28387.2
107.08		28164
106.08		29031.8
105.08		28984.2
104.08		28948.7
103.08		28979.8
102.08		28830
101.08		28748.1
100.08		29134.4
99.08		30387
98.08		30454.5
97.08		30728.7
96.08		30618.4
95.08		30339.3
94.08		30924.4
93.08		30650.3
92.08		31356.9
91.08		32055.2
90.08		31508.9
89.08		31034.9
88.08		30409.6
87.08		29901
86.08		29842.6
85.08		29634.3
84.08		30973.9
83.08		31302.9
82.08		30923.2
81.08		30874.2
80.08		31267.1
79.08		31129.9
78.08		31568.4
77.08		32038.9
76.08		33387.8
75.08		33923.6
74.08		34228.8
73.08		34225.2
72.08		33846
71.08		33594.5
70.08		34231.1
69.08		33016.2
68.08		33494.2
67.08		33320.4
66.08		32677.2
65.08		32501.1
64.08		31546.7
63.08		31241.9
62.08		30872.3
61.08		31500.7
60.08		31305.1
59.08		31435.1
58.08		32686.8
57.08		34593.9
56.08		37835.3
55.08		41633
54.08		47049.9
53.08		49884.5
52.08		48871.4
51.08		45799.1
50.08		40369.1
49.08		35635.6
48.08		32460
47.08		30574.8
46.08		30369.1
45.08		29550.2
44.08		28854.6
43.08		28859.6
42.08		28291.9
41.08		27271
40.08		26733.8
39.08		26534.8
38.08		27357.3
37.08		28657.3
36.08		30190.5
35.08		34807.7
34.08		43956.7
33.08		55221.2
32.08		66722.9
31.08		74767.2
30.08		77357.9
29.08		76417.3
28.08		66200.2
27.08		43190.3
26.08		23923.6
25.08		16783.1
24.08		16606.8
23.08		17296
22.08		15752.2
21.08		13724.2
20.08		12356.9
19.08		12569.8
18.08		14386.7
17.08		16500.7
16.08		16033.4
15.08		12661.3
14.08		7565.43
13.08		4510.34
12.08		4581.92
11.08		5455.46
10.08		6112.89
9.08		7294.57
8.08		9096.66
7.08		11787.8
6.08		13677.4
5.08		13129.6
4.08		10156.5
3.08		6518.26
2.08		5874.52
1.08		6364.49
0.08		4823.08
-0.92		1829.47
-1.92		319.803
-2.92		136.264
-3.92		81.7925
-4.92		55.0715
-5.92		60.3108
-6.92		35.6705
-7.92		26.8935
-8.92		14.7003
-9.92		21.9782

## Sheet: Zr3d
Axis	Elements=	161
S:\data\ssldata\2014\_UNSW\MatSci\140702\ZrN coating before potentiostatic polarization.DATA\Zr3d_0.VGD
Binding Energy (E)			Backgnd.
eV	Counts / s		Counts / s
190.49	5816.24		0
190.39	5704.85		0
190.29	5724.68		0
190.19	5619.23		0
190.09	5783.89		0
189.99	5693.7		0
189.89	5636.79		0
189.79	5769.23		0
189.69	5769.09		0
189.59	5628.03		0
189.49	5850.53		0
189.39	5828.18		0
189.29	5662.64		0
189.19	5654.02		0
189.09	5651.85		0
188.99	5573.54		0
188.89	5808.36		5808.36
188.79	5807.08		5807.08
188.69	5805.68		5805.68
188.59	5804.21		5804.21
188.49	5802.62		5802.62
188.39	5800.89		5800.89
188.29	5798.98		5798.98
188.19	5796.75		5796.75
188.09	5794.26		5794.26
187.99	5791.5		5791.5
187.89	5788.33		5788.33
187.79	5784.56		5784.56
187.69	5780.13		5780.13
187.59	5774.88		5774.88
187.49	5768.63		5768.63
187.39	5761.33		5761.33
187.29	5752.74		5752.74
187.19	5742.59		5742.59
187.09	5730.72		5730.72
186.99	5716.85		5716.85
186.89	5700.72		5700.72
186.79	5682.18		5682.18
186.69	5661.14		5661.14
186.59	5637.53		5637.53
186.49	5611.46		5611.46
186.39	5583.02		5583.02
186.29	5552.37		5552.37
186.19	5519.79		5519.79
186.09	5485.64		5485.64
185.99	5450.17		5450.17
185.89	5413.82		5413.82
185.79	5376.83		5376.83
185.69	5339.62		5339.62
185.59	5302.48		5302.48
185.49	5265.5		5265.5
185.39	5228.85		5228.85
185.29	5192.39		5192.39
185.19	5155.94		5155.93
185.09	5119.31		5119.28
184.99	5082.25		5082.18
184.89	5044.49		5044.32
184.79	5005.6		5005.22
184.69	4965.31		4964.47
184.59	4923.46		4921.67
184.49	4880.07		4876.35
184.39	4835.74		4828.23
184.29	4791.68		4776.94
184.19	4750.6		4722.45
184.09	4716.92		4664.7
183.99	4697.96		4603.76
183.89	4704.92		4539.78
183.79	4754.4		4473
183.69	4869.64		4403.72
183.59	5081.64		4332.28
183.49	5429.02		4258.83
183.39	5956.64		4183.64
183.29	6710.98		4106.84
183.19	7732.04		4028.6
183.09	9040.7		3948.93
182.99	10623		3867.87
182.89	12413.8		3785.6
182.79	14286		3702.38
182.69	16052.8		3618.5
182.59	17490.8		3534.28
182.49	18384.8		3450.35
182.39	18581.9		3367.29
182.29	18037.3		3285.92
182.19	16827.6		3207.06
182.09	15128.2		3131.39
181.99	13163.9		3059.62
181.89	11155		2992.2
181.79	10078.2		2929.27
181.69	9351		2870.9
181.59	8333.09		2816.8
181.49	7642.07		2766.59
181.39	7271.48		2719.64
181.29	7008.54		2675.33
181.19	7046.84		2632.7
181.09	7294.52		2590.66
180.99	7876.6		2548.18
180.89	8630.87		2504.21
180.79	9237.69		2457.91
180.69	10402.2		2408.47
180.59	11631.1		2355.22
180.49	14007.5		2297.84
180.39	16770.2		2236.48
180.29	19469.2		2171.41
180.19	21789.2		2103.21
180.09	23405.1		2032.89
179.99	24059.5		1961.71
179.89	23635.4		1891.2
179.79	22192.4		1822.78
179.69	19947.9		1757.88
179.59	17214.7		1697.86
179.49	14320		1643.78
179.39	11539.9		1596.33
179.29	9064.6		1555.76
179.19	6992.99		1522.12
179.09	5348.32		1495.09
178.99	4101.59		1474.06
178.89	3195.1		1458.28
178.79	2560.62		1446.75
178.69	2132.15		1438.59
178.59	1852.48		1433
178.49	1675.69		1429.16
178.39	1567.3		1426.49
178.29	1502.81		1424.63
178.19	1465.48		1423.28
178.09	1444.39		1422.26
177.99	1432.73		1421.45
177.89	1426.33		1420.74
177.79	1422.77		1420.08
177.69	1420.76		1419.49
177.59	1419.54		1418.96
177.49	1418.73		1418.47
177.39	1418.14		1418.03
177.29	1417.69		1417.64
177.19	1417.29		1417.28
177.09	1416.96		1416.95
176.99	1416.63		1416.63
176.89	1416.33		1416.33
176.79	1416.08		1416.08
176.69	1415.91		1415.91
176.59	1415.74		1415.74
176.49	1415.59		1415.59
176.39	1415.45		1415.45
176.29	1415.32		1415.32
176.19	1415.21		1415.21
176.09	1417.04		0
175.99	1430.99		0
175.89	1395.98		0
175.79	1381.31		0
175.69	1438.86		0
175.59	1439.78		0
175.49	1483.42		0
175.39	1461.56		0
175.29	1425.01		0
175.19	1408.31		0
175.09	1301.17		0
174.99	1320.95		0
174.89	1300.4		0
174.79	1399.46		0
174.69	1389.15		0
174.59	1417.66		0
174.49	1390.57		0

## Sheet: N1s
Axis	Energy	Elements=	161
S:\data\ssldata\2014\_UNSW\MatSci\Song Xu_140702\Q5.DATA\N1s_0.VGD
Binding Energy (E)				Backgnd.
eV		Counts / s		Counts / s
404.88		11523.1		0
404.78		11577.3		0
404.68		11399.9		0
404.58		11360.8		0
404.48		11296.9		0
404.38		11356.2		0
404.28		11372.1		0
404.18		11351.2		0
404.08		11302.2		0
403.98		11206.4		0
403.88		11413.3		0
403.78		11436.3		0
403.68		11346.2		0
403.58		11367.3		0
403.48		11415.6		0
403.38		11404.9		0
403.28		11437.2		0
403.18		11483.5		0
403.08		11398.9		0
402.98		11415.3		0
402.88		11519.6		0
402.78		11239		0
402.68		11334.2		0
402.58		11472.8		0
402.48		11351.8		0
402.38		11507.1		0
402.28		11544.8		0
402.18		11512.2		0
402.08		11547.3		0
401.98		11576.8		0
401.88		11584.5		0
401.78		11333.8		0
401.68		11530.1		0
401.58		11574.4		0
401.48		11741.9		0
401.38		11366.1		0
401.28		11483.6		0
401.18		11479.2		0
401.08		11513.3		0
400.98		11697.2		0
400.88		11739.7		11645.3
400.78		11713		11645.1
400.68		11695.4		11645
400.58		11679.4		11644.8
400.48		11747.6		11644.7
400.38		11721.9		11644.5
400.28		11513.2		11644.4
400.18		11701.8		11644.3
400.08		11722.9		11644.1
399.98		11682.9		11643.8
399.88		11658.2		11643.6
399.78		11761.8		11643.3
399.68		11884.8		11643
399.58		11909.2		11642.6
399.48		11883.9		11642.1
399.38		11851.4		11641.7
399.28		11875.1		11641.1
399.18		11874.5		11640.5
399.08		11793.7		11639.7
398.98		11963.5		11638.9
398.88		11976.7		11637.9
398.78		12246.5		11636.8
398.68		12318.5		11635.6
398.58		12329.4		11634.2
398.48		12338.7		11632.6
398.38		12445.5		11630.7
398.28		12615.2		11628.6
398.18		12766		11626
398.08		12746.6		11623
397.98		13063.2		11619.2
397.88		13387.6		11614.6
397.78		13903.7		11608.7
397.68		14767.8		11601.4
397.58		15608.6		11592.5
397.48		16703.1		11582.1
397.38		18238.6		11570.1
397.28		19367.8		11556.7
397.18		20126.4		11542.1
397.08		20331.1		11526.7
396.98		20335.9		11510.6
396.88		19640.3		11494.3
396.78		18971.8		11478
396.68		18190		11462.2
396.58		17480.8		11447.5
396.48		16980.3		11433.9
396.38		16247.6		11421.8
396.28		15255.5		11411.2
396.18		14604.8		11402
396.08		13956.4		11394.1
395.98		13269.5		11387.6
395.88		12862.1		11382.2
395.78		12598.8		11377.9
395.68		12127.2		11374.6
395.58		11926.2		11372.1
395.48		11782.1		11370.1
395.38		11573.9		11368.8
395.28		11325.8		11367.7
395.18		11417.1		11367
395.08		11539.1		11366.6
394.98		11439.2		11366.2
394.88		11404.9		11366
394.78		11333.2		11365.8
394.68		11503.6		11365.7
394.58		11505.2		11365.5
394.48		11363.3		11365.4
394.38		11453		11365.4
394.28		11393.6		11365.3
394.18		11312.9		11365.2
394.08		11296.1		11365.1
393.98		11389.3		11365.1
393.88		11477.8		0
393.78		11321.7		0
393.68		11364.2		0
393.58		11464.5		0
393.48		11445		0
393.38		11518.9		0
393.28		11403		0
393.18		11331.7		0
393.08		11419.7		0
392.98		11389.5		0
392.88		11427.7		0
392.78		11531.5		0
392.68		11369		0
392.58		11262.8		0
392.48		11390.4		0
392.38		11393.6		0
392.28		11568.4		0
392.18		11544.8		0
392.08		11402.1		0
391.98		11587.9		0
391.88		11505.2		0
391.78		11491.4		0
391.68		11374		0
391.58		11410.1		0
391.48		11491.5		0
391.38		11504.7		0
391.28		11490		0
391.18		11463		0
391.08		11261.5		0
390.98		11396.2		0
390.88		11437.5		0
390.78		11684.2		0
390.68		11613.7		0
390.58		11354.7		0
390.48		11466.9		0
390.38		11529.3		0
390.28		11185.8		0
390.18		11337.7		0
390.08		11537.6		0
389.98		11365.7		0
389.88		11452.7		0
389.78		11616.7		0
389.68		11485.3		0
389.58		11497		0
389.48		11422.5		0
389.38		11491.5		0
389.28		11608.7		0
389.18		11491.6		0
389.08		11506.4		0
388.98		11546.2		0
388.88		11578.9		0

## Sheet: C1s
Axis	Energy	Elements=	161
S:\data\ssldata\2014\_UNSW\MatSci\Song Xu_140702\Q5.DATA\C1s_0.VGD
Binding Energy (E)				Backgnd.
eV		Counts / s		Counts / s
291.88		6417.47		0
291.78		6293.94		0
291.68		6393.33		0
291.58		6370.08		0
291.48		6424.06		0
291.38		6409.3		0
291.28		6375.85		0
291.18		6266.51		0
291.08		6340.1		0
290.98		6295.09		0
290.88		6309.86		0
290.78		6419.11		0
290.68		6323.94		0
290.58		6316.86		0
290.48		6354.37		0
290.38		6275.54		0
290.28		6350.57		0
290.18		6305.76		0
290.08		6295.23		0
289.98		6367.18		0
289.88		6410.73		0
289.78		6500.88		0
289.68		6413.91		6398.19
289.58		6429.34		6398.19
289.48		6403.63		6398.19
289.38		6261.64		6398.19
289.28		6343.98		6398.19
289.18		6320.27		6398.19
289.08		6373.59		6398.19
288.98		6382.7		6398.19
288.88		6343.33		6398.19
288.78		6311.38		6398.19
288.68		6486.77		6398.19
288.58		6450.58		6398.19
288.48		6306.26		6398.19
288.38		6341.24		6398.19
288.28		6357.95		6398.19
288.18		6365.65		6398.19
288.08		6371.09		6398.19
287.98		6414.11		6398.19
287.88		6493.01		6398.19
287.78		6448.2		6398.18
287.68		6404.18		6398.18
287.58		6643.6		6398.18
287.48		6453.83		6398.17
287.38		6456.68		6398.17
287.28		6591.52		6398.16
287.18		6473.59		6398.15
287.08		6407.15		6398.15
286.98		6448.44		6398.14
286.88		6558.85		6398.13
286.78		6616.12		6398.12
286.68		6620.38		6398.11
286.58		6561.41		6398.11
286.48		6595.44		6398.1
286.38		6553.82		6398.09
286.28		6561.09		6398.08
286.18		6482.63		6398.06
286.08		6615.5		6398.05
285.98		6570.68		6398.04
285.88		6552.02		6398.03
285.78		6657.09		6398.01
285.68		6627.23		6398
285.58		6771.85		6397.98
285.48		6668.12		6397.97
285.38		6774.86		6397.95
285.28		6785.48		6397.93
285.18		6667.02		6397.9
285.08		6823.83		6397.88
284.98		6991.09		6397.86
284.88		6771.29		6397.83
284.78		6851.94		6397.81
284.68		6807.79		6397.79
284.58		6719.5		6397.76
284.48		6662.81		6397.74
284.38		6710.67		6397.73
284.28		6578.61		6397.71
284.18		6603.54		6397.69
284.08		6569.38		6397.68
283.98		6458.02		6397.67
283.88		6448.1		6397.66
283.78		6595.07		6397.66
283.68		6438.91		6397.65
283.58		6422.67		6397.64
283.48		6316.67		6397.64
283.38		6493.08		6397.63
283.28		6509.64		6397.63
283.18		6594.46		6397.62
283.08		6553.82		6397.61
282.98		6533.55		6397.6
282.88		6661.91		6397.59
282.78		6662.76		6397.57
282.68		6670.68		6397.55
282.58		6711.91		6397.53
282.48		6791.65		6397.5
282.38		6993.93		6397.47
282.28		7137.73		6397.43
282.18		7322.77		6397.39
282.08		7370.6		6397.35
281.98		7469.92		6397.3
281.88		7302.28		6397.26
281.78		7175.13		6397.22
281.68		7010.71		6397.17
281.58		6898.98		6397.14
281.48		6762.23		6397.1
281.38		6613.08		6397.07
281.28		6732.56		6397.05
281.18		6621.31		6397.03
281.08		6432.94		6397.02
280.98		6521.96		6397.01
280.88		6398.49		6397
280.78		6401.63		6397
280.68		6380.63		6396.99
280.58		6435.92		6396.99
280.48		6352.32		6396.99
280.38		6365.69		6396.99
280.28		6366.58		6396.99
280.18		6386.32		6396.99
280.08		6474.37		6396.99
279.98		6334.5		6396.99
279.88		6404.42		6396.99
279.78		6307.34		6396.99
279.68		6387.9		6396.99
279.58		6378.89		6396.99
279.48		6405.11		6396.99
279.38		6290.71		6396.99
279.28		6490.71		6396.99
279.18		6422.05		6396.99
279.08		6514.5		6396.99
278.98		6441.1		6396.99
278.88		6421.15		6396.99
278.78		6360.6		6396.99
278.68		6452.68		6396.98
278.58		6373.36		6396.98
278.48		6278.39		6396.98
278.38		6318.74		6396.98
278.28		6497.67		6396.98
278.18		6490.41		6396.98
278.08		6351.25		6396.98
277.98		6440.87		6396.98
277.88		6465.75		6396.98
277.78		6385.73		6396.98
277.68		6404.32		6396.98
277.58		6310.94		6396.98
277.48		6347.22		6396.98
277.38		6402.04		6396.97
277.28		6439.92		6396.97
277.18		6492.64		6396.97
277.08		6686.26		6396.97
276.98		6436.52		6396.97
276.88		6345.75		6396.96
276.78		6412.49		6396.96
276.68		6494.47		6396.96
276.58		6444.26		6396.95
276.48		6391.17		6396.95
276.38		6351.11		6396.95
276.28		6346.64		6396.95
276.18		6337.91		0
276.08		6414.47		0
275.98		6493.07		0
275.88		6451.51		0

## Sheet: Peak Table
Peak Table :	survey
	Name	Start BE	Peak BE	End BE	FWHM eV	Area (P) CPS.eV	At. %	SF Al Scof
	Zr3d	189.08	181.62	172.08	6.26	2.45127e+06	67.15	7.04
	N1s	403.08	397.2	393.08	2.98	252391	28.93	1.8
	C1s	287.08	282.21	276.08	2.32	19789	3.92	1

## Sheet: Titles
12:37:30 Thursday, July 03, 2014
ZrN coating before potentiostatic polarization.vgp - Processing View
Data Files :	Title	File Name	Comment
	Survey	S:\...\2014\_UNSW\MatSci\140702\ZrN coating before potentiostatic polarization.DATA\Survey.VGD
	Zr3d	S:\data\ssldata\2014\_UNSW\MatSci\140702\ZrN coating before potentiostatic polarization.DATA\Zr3d.VGD
	N1s	S:\data\ssldata\2014\_UNSW\MatSci\140702\ZrN coating before potentiostatic polarization.DATA\N1s.VGD
	C1s	S:\data\ssldata\2014\_UNSW\MatSci\140702\ZrN coating before potentiostatic polarization.DATA\C1s.VGD

## Sheet: Experimental
Surface Analysis Laboratory
Solid State Elemental Analysis Unit
Mark Wainwright Analytical Centre
Room G61, Chemical Sciences Building F10
The University of New South Walse
Sydney, NSW 2052, Australia
Analytical Technique:	X-Ray Photoelectron Spectroscopy (XPS)
Instrument:	ESCALAB250Xi
Manufacturer:	Thermo Scientific, UK
Background vacuum:	better than 2E-9 mbar
X-ray source:	mono-chromated Al K alpha (energy 1486.68 eV)
Power:	150W (13 kV x 12 mA)
Spot size:	500 micrometres
Photoelectron takeoff angle:	90 degrees
Pass energy:	100 eV for survey scans, or 20 eV for region scans
Software:	Avantage
Spectrometre calibration:	Au 4f7 = 83.96 eV, Ag 3d5 = 368.21 eV, Cu2p3 = 932.62 eV
Binding energy reference:	C 1s = 285.0 eV for adventitious hydrocarbon
